# Supplementary material for: Synthesis of ultralong MnO/C coaxial nanowires as freestanding anodes for high-performance lithium ion batteries
Source: Royal Society of Chemistry journal article supplement (doi:10.1039/c5ta02440d), 2015-01-01
Supplement: c5ta02440d1.pdf [file c5ta02440d1.pdf]

Electronic Supplementary Information for

**Synthesis of ultralong MnO/C coaxial nanowires as freestanding anodes for high-performance lithium ion batteries**

Jian-Gan Wang<sup>a</sup>, Cunbao Zhang<sup>a</sup>, Dandan Jin<sup>a</sup>, Keyu Xie<sup>a</sup>, Bingqing Wei<sup>a, b\*</sup>

<sup>a</sup> *State Key Laboratory of Solidification Processing, Center for Nano Energy Materials, School of Materials Science and Engineering, Northwest Polytechnic University, Xi'an 710072, China*

<sup>b</sup> *Department of Mechanical Engineering, University of Delaware, Newark, DE19716, USA*

\*Address correspondence to (Bingqing Wei): E-mail: [weib@udel.edu](mailto:weib@udel.edu)

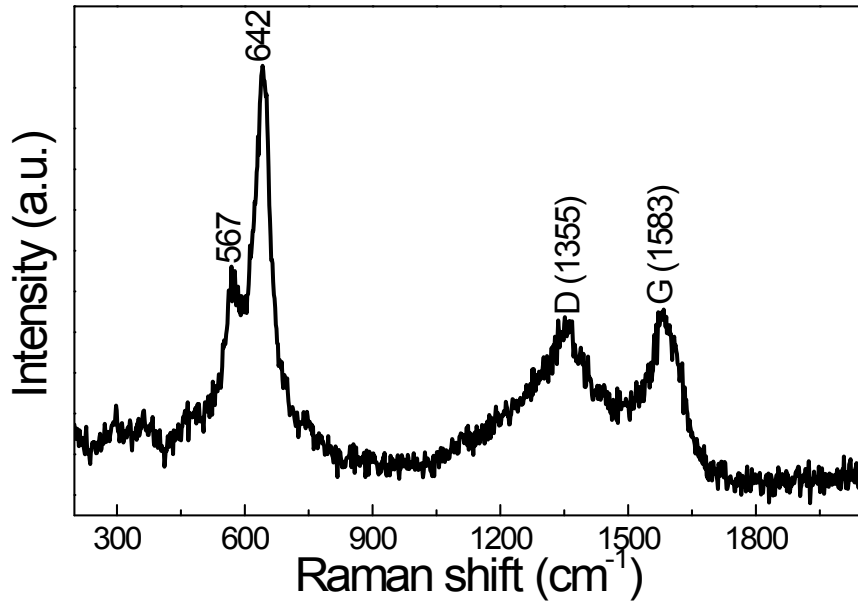

Fig. S1. Raman spectrum of MnO/C.

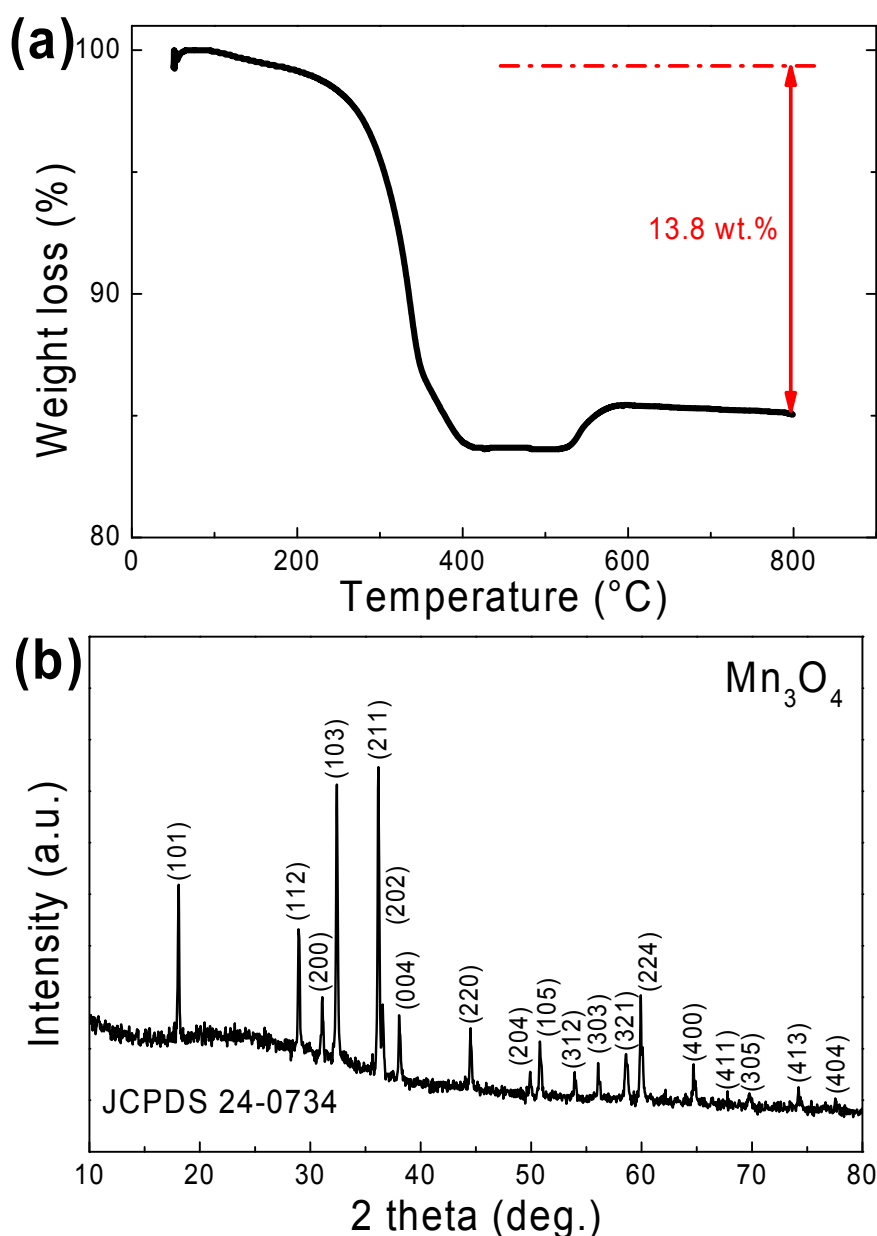

**Fig. S2.** (a) TGA curves of MnO/C nanocomposites. (b) XRD pattern of MnO/C after annealed at 800 °C in air. The final product belongs to the tetragonal structure of Mn<sub>3</sub>O<sub>4</sub> phase (JCPDS 24-0734) from the XRD pattern, indicating MnO was oxidized to form Mn<sub>3</sub>O<sub>4</sub>. In theory, this oxidation process will give rise to 7.5 wt.% weight increase. Assumed the total mass is 1 and carbon content is  $x$ , then MnO content is  $(1-x)$ . As shown in the TGA curve, the weight loss can be calculated using  $x - 7.5\text{wt.}\%(1-x)$ , which corresponds to the weight loss of 13.8wt.%. Then the carbon content  $x$  equals to 19.8 wt.%.

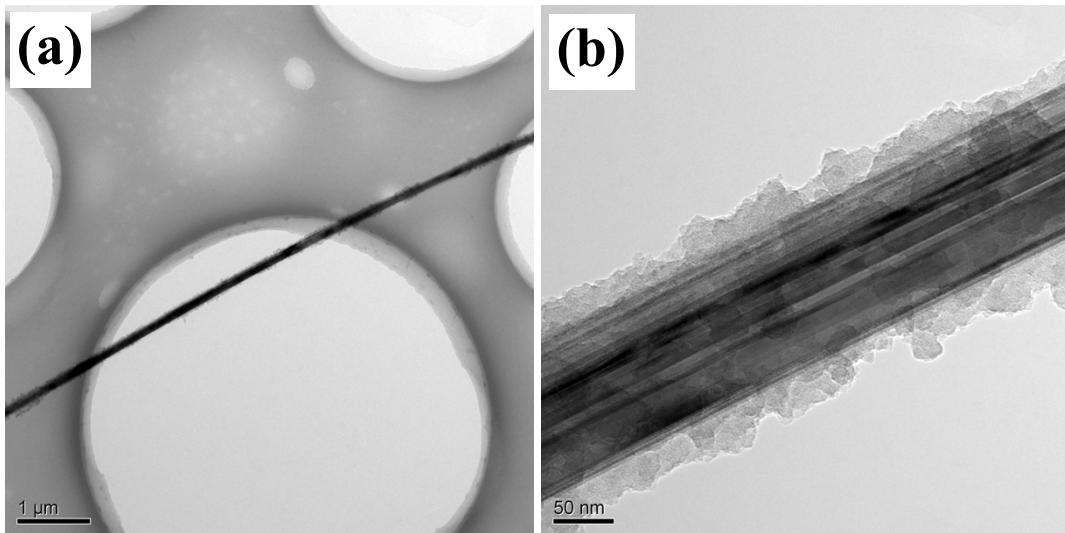

**Fig. S3.** TEM images of MnO<sub>2</sub>/PPy core-shell nanostructures.

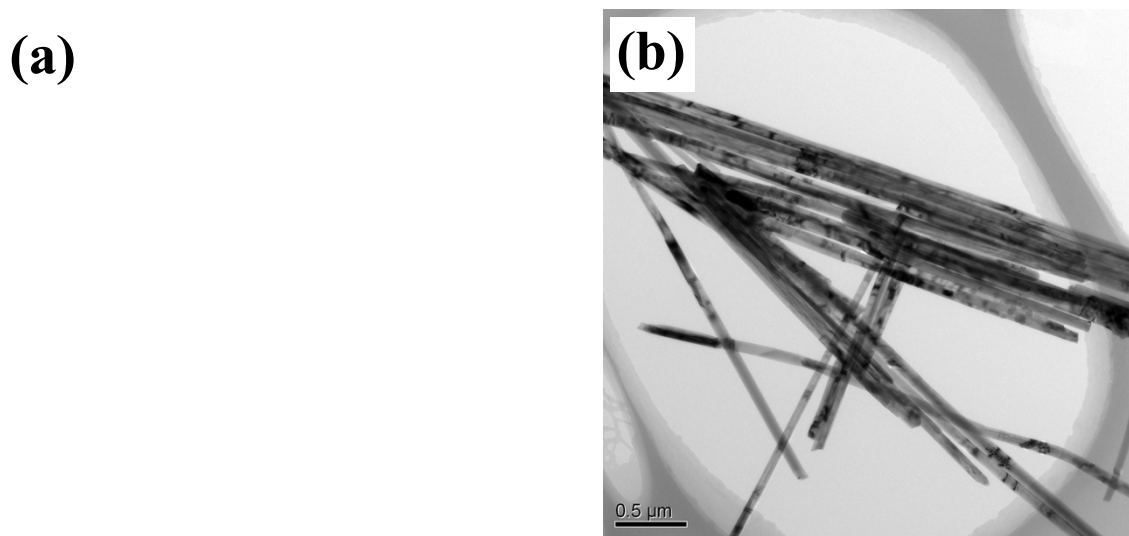

**Fig. S4.** (a) SEM and (b) TEM images of MnO nanostructures.

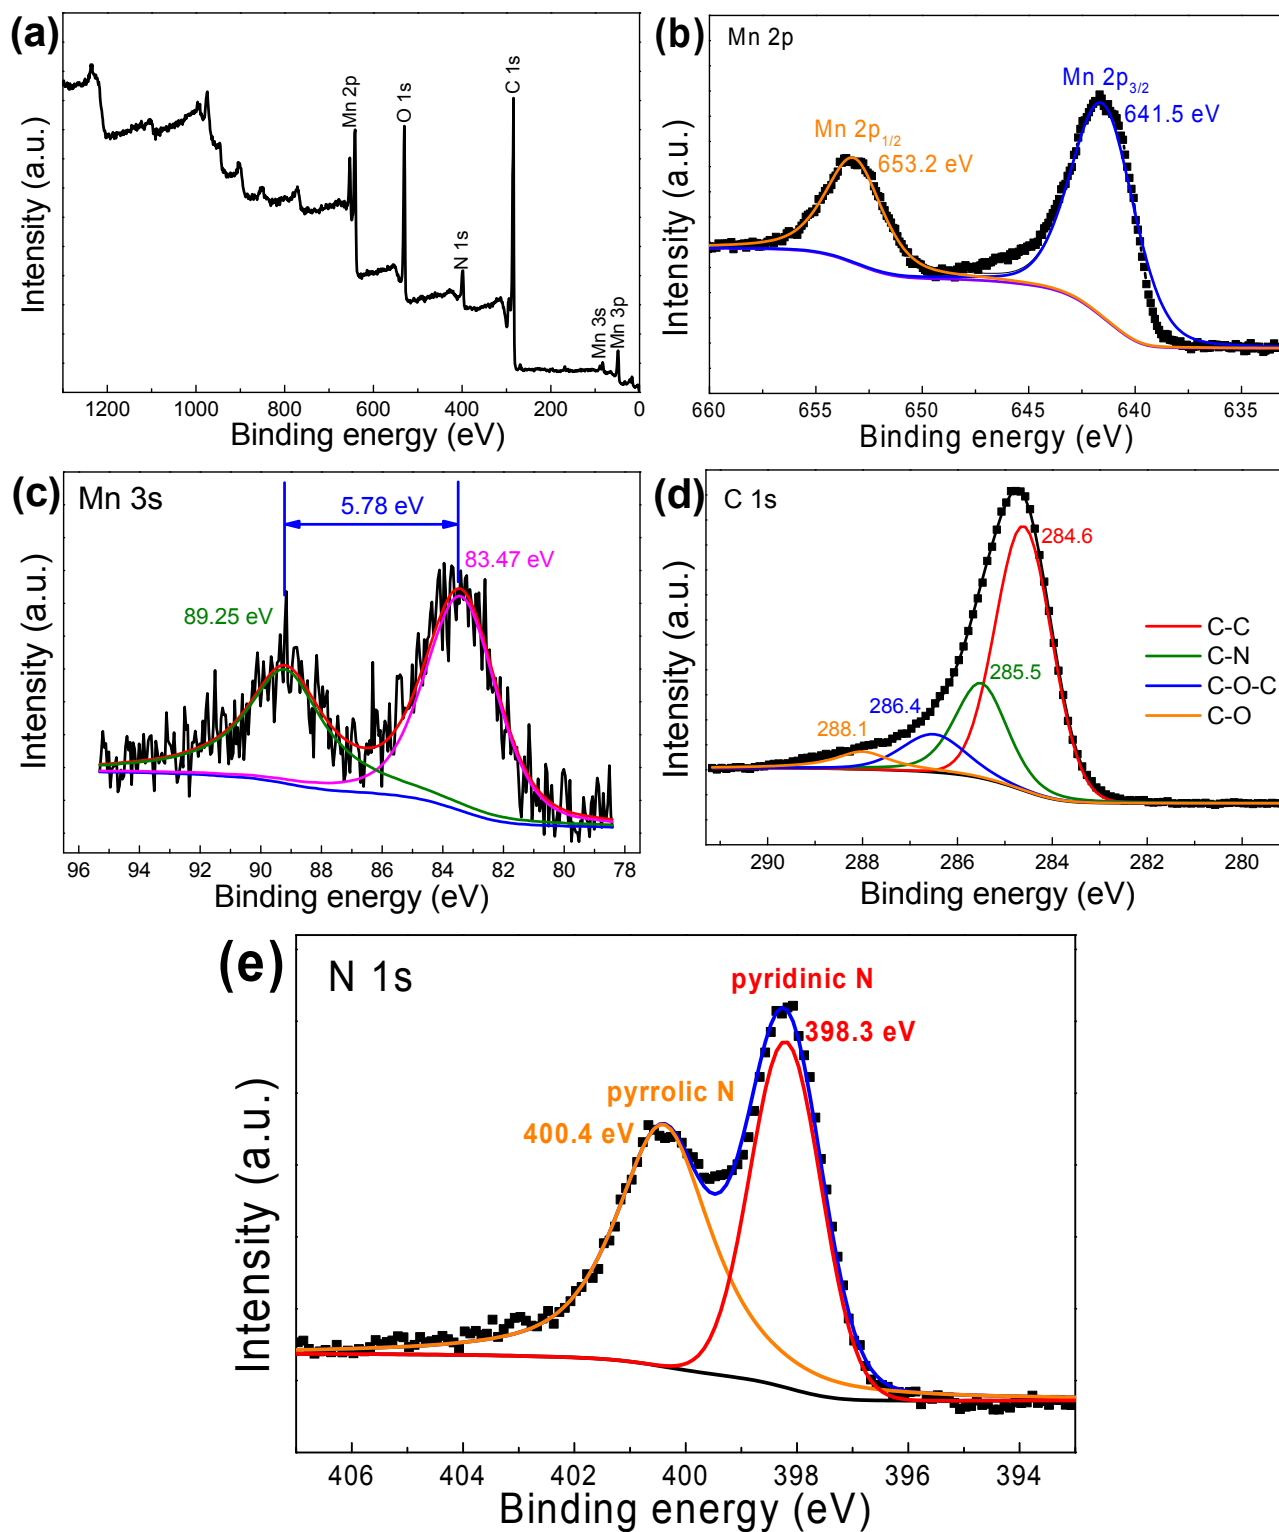

**Fig. S5.** XPS spectra for the MnO/C nanocomposite: the survey spectrum (a) and the high resolution spectra for (b) Mn 2p, (c) Mn 3s, (d) C 1s and (e) N 1s.

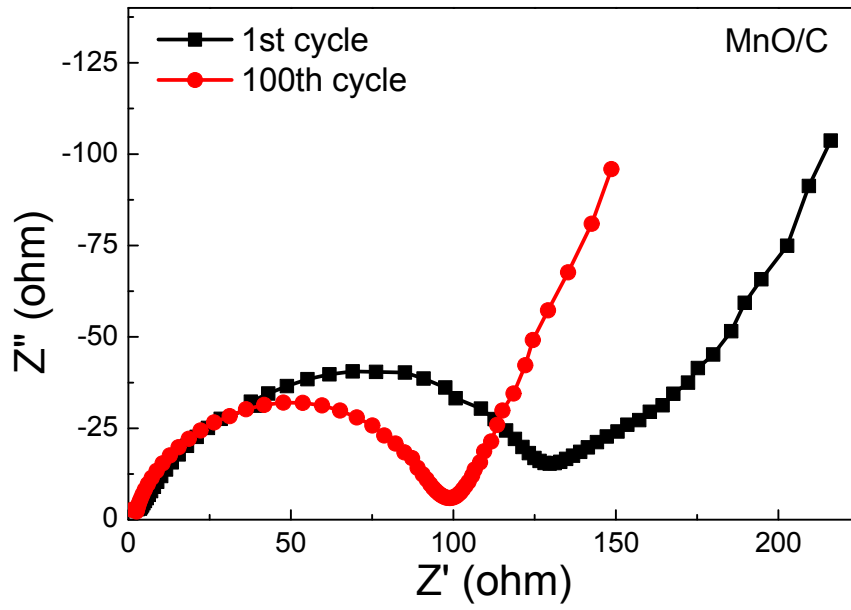

Fig. S6. EIS spectra of MnO/C anode in the first cycle and after 100 cycles.

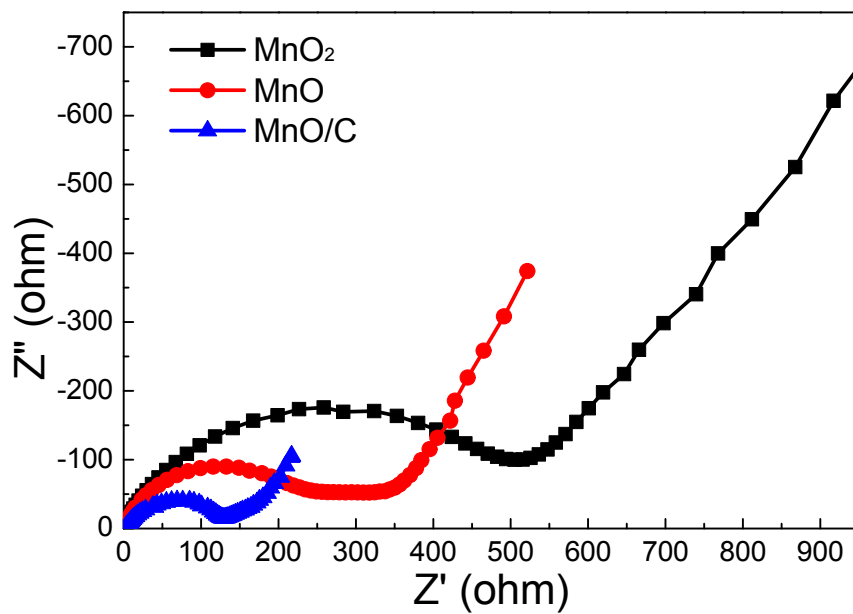

Fig. S7. EIS spectra of MnO/C, MnO and MnO anodes.

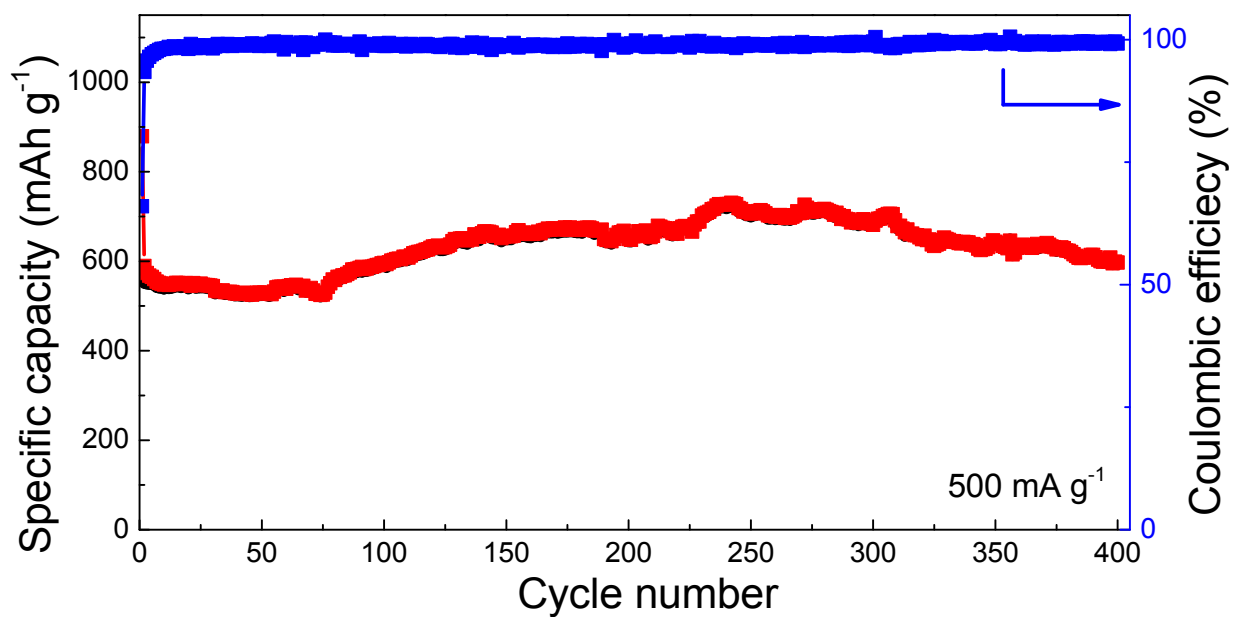

**Fig. S8.** Cycling performance of MnO/C anode at a current density of 500 mA g<sup>-1</sup>.
